# Supplementary material for: Absence of hyperfibrinolysis may explain lack of efficacy of tranexamic acid in hypoproliferative thrombocytopenia
Source: PubMed Central journal article supplement — Blood Adv. 2022 Sep 2;7(6):900–8. doi: 10.1182/bloodadvances.2022008255 (PMC10025092; doi:10.1182/bloodadvances.2022008255), 2022-09-02
Supplement: BLOODA_ADV-2022-008255-mmc1.pdf [file BLOODA_ADV-2022-008255-mmc1.pdf]

## Supplementary Materials for Ilich et al. (TXA ineffective in absence of hyperfibrinolysis)

Supplementary Table 1.

|                                  |              | FEAT<br>N=119 | Non-<br>FEAT<br>N=211 | p-value |
|----------------------------------|--------------|---------------|-----------------------|---------|
| Age                              | mean<br>(sd) | 53 (12.6)     | 54.5 (12.8)           | 0.36    |
| Sex                              |              |               |                       |         |
| Male                             | n (%)        | 54<br>(45.4%) | 84 (39.8%)            | 0.39    |
| Female                           | n (%)        | 65<br>(54.6%) | 127<br>(60.2%)        |         |
| BMI                              | mean<br>(sd) | 31.0 (8.0)    | 28.6 (5.8)            | <0.01   |
| Race                             |              |               |                       |         |
| American Indian/Alaska Native    | n (%)        | 0 (0%)        | 6 (2.8%)              | 0.18    |
| Asian                            | n (%)        | 3 (2.5%)      | 9 (4.3%)              |         |
| Native Hawaiian/Pacific Islander | n (%)        | 0 (0%)        | 0 (0%)                |         |
| Black/African American           | n (%)        | 12<br>(10.1%) | 11 (5.2%)             |         |
| White                            | n (%)        | 98<br>(82.4%) | 172<br>(81.5%)        |         |
| More than one                    | n (%)        | 1 (0.8%)      | 5 (2.4%)              |         |
| Unknown/not reported             | n (%)        | 4 (3.4%)      | 4 (1.9%)              |         |
| Ethnicity                        |              |               |                       |         |
| Hispanic                         | n (%)        | 4 (3.4%)      | 9 (4.3%)              | 0.82    |
| Non-Hispanic                     | n (%)        | 92<br>(77.3%) | 166<br>(78.7%)        |         |
| Unknown/not reported             | n (%)        | 23<br>(19.3%) | 36 (17.1%)            |         |
| Primary diagnosis                |              |               |                       |         |
| Aplastic anemia                  | n (%)        | 4 (3.4%)      | 5 (2.4%)              | 0.01    |
| Acute myeloid leukemia           | n (%)        | 41<br>(34.5%) | 110<br>(52.1%)        |         |
| Acute lymphoblastic leukemia     | n (%)        | 10 (8.4%)     | 11 (5.2%)             |         |
| Chronic myelogenous leukemia     | n (%)        | 4 (3.4%)      | 4 (1.9%)              |         |
| Chronic lymphocytic leukemia     | n (%)        | 1 (0.8%)      | 1 (0.5%)              |         |

|                             |       |               |                |       |
|-----------------------------|-------|---------------|----------------|-------|
| Non-Hodgkin's lymphoma      | n (%) | 12<br>(10.1%) | 17 (8.1%)      |       |
| Hodgkin's Lymphoma          | n (%) | 4 (3.4%)      | 8 (3.8%)       |       |
| Myelodysplastic syndrome    | n (%) | 11 (3.4%)     | 26 (2.4%)      |       |
| Myeloma                     | n (%) | 13<br>(10.9%) | 12 (5.7%)      |       |
| Myelofibrosis               | n (%) | 5 (4.2%)      | 12 (5.7%)      |       |
| Other                       | n (%) | 14<br>(11.8%) | 5 (2.4%)       |       |
| Therapeutic group           |       |               |                |       |
| Allogeneic transplant       | n (%) | 57<br>(47.9%) | 71 (33.6%)     | <0.01 |
| Acute autologous transplant | n (%) | 36<br>(30.3%) | 36 (17.1%)     |       |
| Chemo/immunotherapy         | n (%) | 26<br>(21.8%) | 104<br>(49.3%) |       |
| Outcome                     |       |               |                |       |
| WHO Grade 2+ bleeding       |       | 54 (45%)      | 152 (46%)      | >0.99 |

**Supplementary Table 1. Demographics comparison of FEAT participants with non-FEAT A-TREAT subjects.**

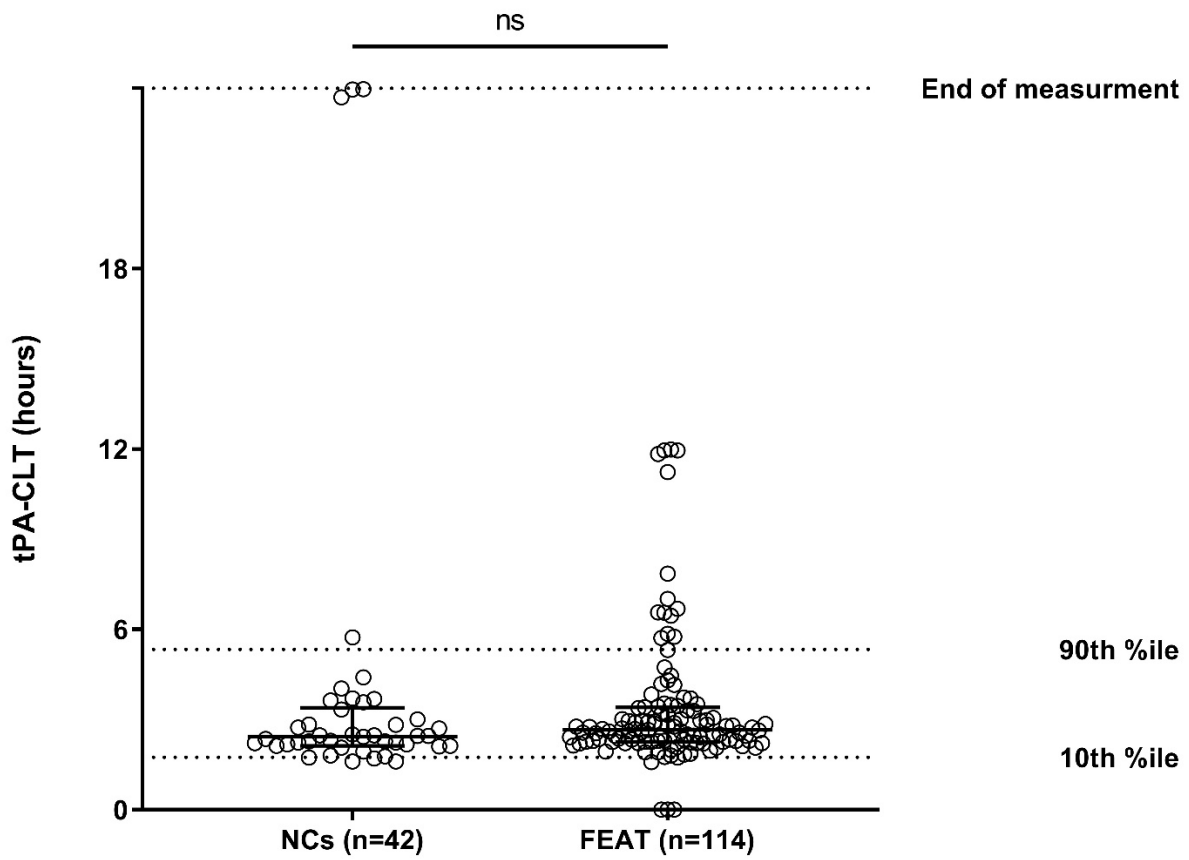

Supplementary figure 1

Supplemental figure 1: Baseline tPA-challenged clot lysis times (tPA-CLT) in FEAT participants compared to normal controls (NCs).

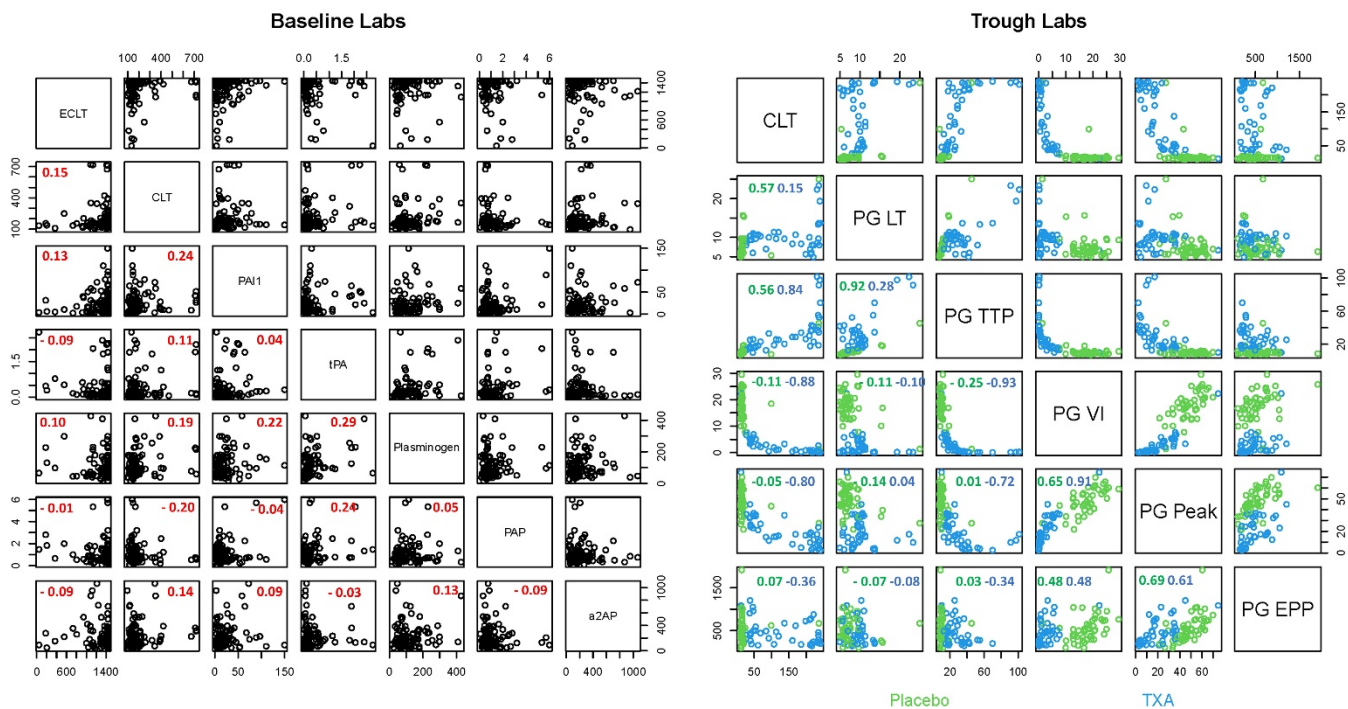

Supplementary figure 2

**Supplemental figure 2: Correlation matrices between measured fibrinolysis parameters at baseline and trough study drug levels.** In red – Spearman’s r correlation coefficient between all baseline fibrinolysis parameters. In green – Spearman’s r correlation coefficient between placebo treated trough level fibrinolysis parameters. In blue – Spearman’s r correlation coefficient between TXA treated trough level fibrinolysis parameters.
